# Supplementary material
Source: PubMed Central journal article supplement (PMC9811521)
Supplement: NIHMS1851417-supplement-Supp.pdf [file NIHMS1851417-supplement-Supp.pdf]

**Anticancer and Chemosensitization Effects of Cannabidiol in 2D and 3D cultures of TNBC: Involvement of GADD45 $\alpha$ , Integrin- $\alpha$ 5, - $\beta$ 5, - $\beta$ 1 and autophagy**

Sunil Kumar Surapaneni<sup>a#</sup>, Nilkumar Patel<sup>a#</sup>, Li Sun<sup>b</sup>, Nagavendra Kommineni<sup>a</sup>, Anil Kumar Kalvala<sup>a</sup>, Aragaw Gebeyehu<sup>a</sup>, Peggy Arthur<sup>a</sup>, Leanne C Duke<sup>b</sup>, Ramesh Nimma<sup>a</sup>, David G Meckes Jr<sup>b</sup> and Mandip Singh<sup>a\*</sup>

<sup>a</sup>College of Pharmacy and Pharmaceutical Sciences, Florida A&M University, Tallahassee, FL, 32307, USA

<sup>b</sup>Department of Biomedical Sciences, Florida State University College of Medicine, 1115 West Call Street, Tallahassee, FL, 32306-4300, USA

<sup>#</sup>These authors contributed equally

\*Corresponding Author:

Prof. Mandip Singh, Ph.D.

College of Pharmacy and Pharmaceutical Sciences, Florida A&M University, Tallahassee, Florida, 32307, USA.

Tel: +1- 850-561-2790 Fax: 850-599-3813; E-mail: [mandip.sachdeva@gmail.com](mailto:mandip.sachdeva@gmail.com)

**Running Title:** Cannabidiol induces apoptosis in TNBC by altering GADD45A

**Journal name:** Drug Delivery and Translational Research

**Acknowledgments**

We acknowledge National Institute on Minority Health and Health Disparities of National Institutes of Health, Grant/Award Number: U54 MD007582 and Consortium for Medical Marijuana Clinical Outcomes Research (Reference Award number: SUB00002097) for providing the funding for carrying out this study.

**List of Materials included**

- 1) Supplementary Figures
- 2) Supplementary Tables
- 3) Uncropped blots images

# 1) Supplementary Figures

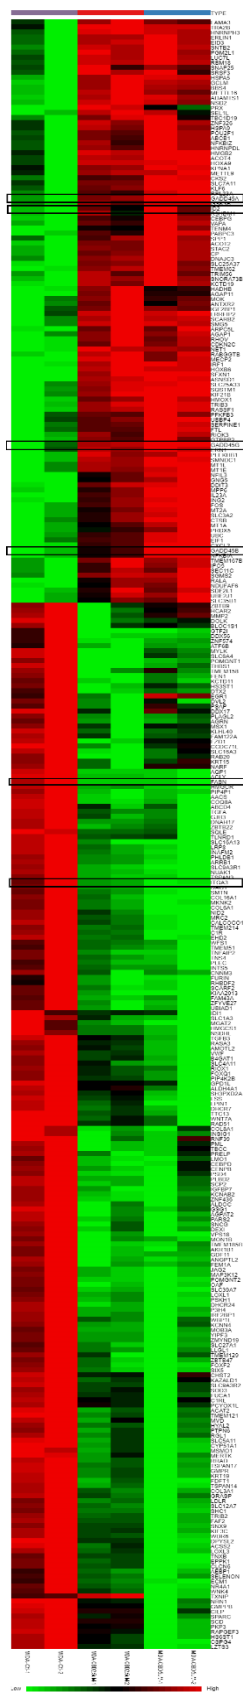

Supplementary Fig. 1 High resolution heat map image of differentially expressed genes with CBD treatment in MDA-MB-231 cells

Supplementary Fig. 2 Effect of CBD on the expression of GADD45 $\alpha$  in MDA-MB-468 cells

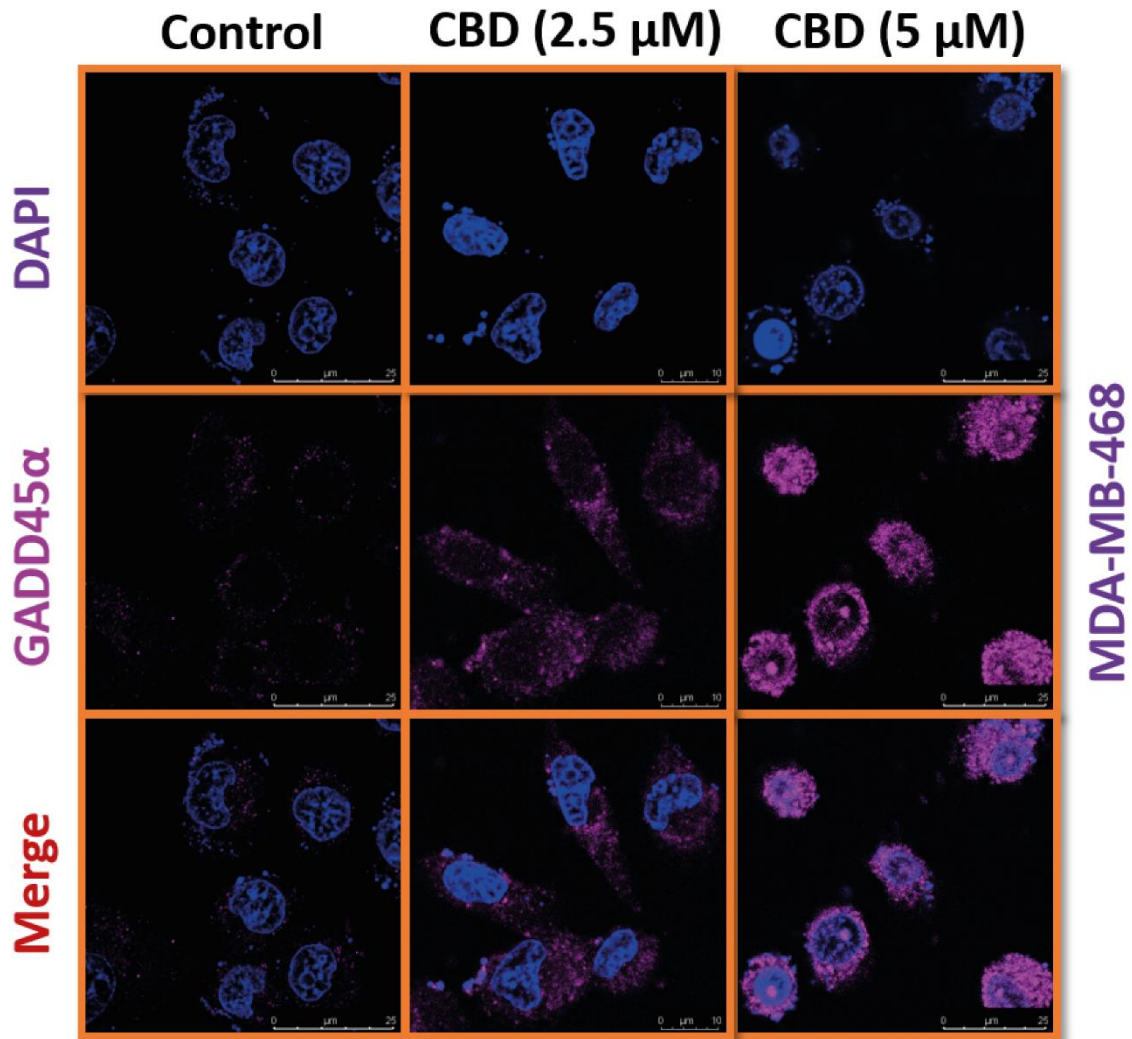

Supplementary Fig. 2 Immunocytochemical analysis of GADD45 $\alpha$  in MDA-MB-468 cells treated with CBD for 48 h.

Supplementary Fig. 3 Effect of CBD on cell cycle progression of triple negative breast cancer cell lines

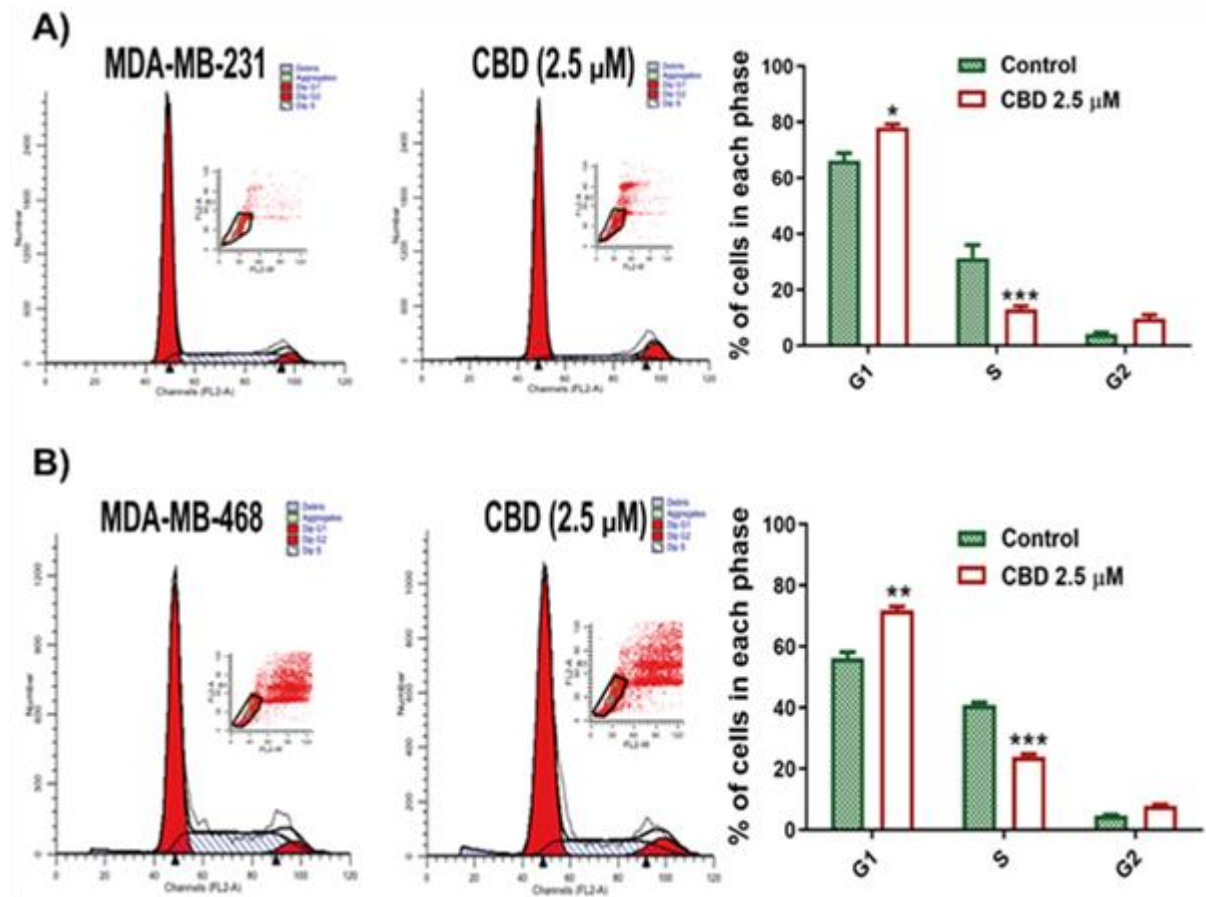

**Supplementary Fig. 3** Flow cytometry of cell cycle analysis. A & B) Representation of the flow histograms and bar graphs showing cell cycle analysis after staining with propidium iodide (PI) in MDA-MB-231 and MDA-MB-468 cells treated with CBD (2.5 μM) and compared to control. All values are expressed as mean ± SEM (n=3). \*p<0.05, \*\*\*p<0.001 v.s Control.

Supplementary Fig. 4 Effect of CBD on the expression of integrin- $\alpha$ 5 and integrin- $\beta$ 5 in 3D cultures of MDA-MB-231 cells.

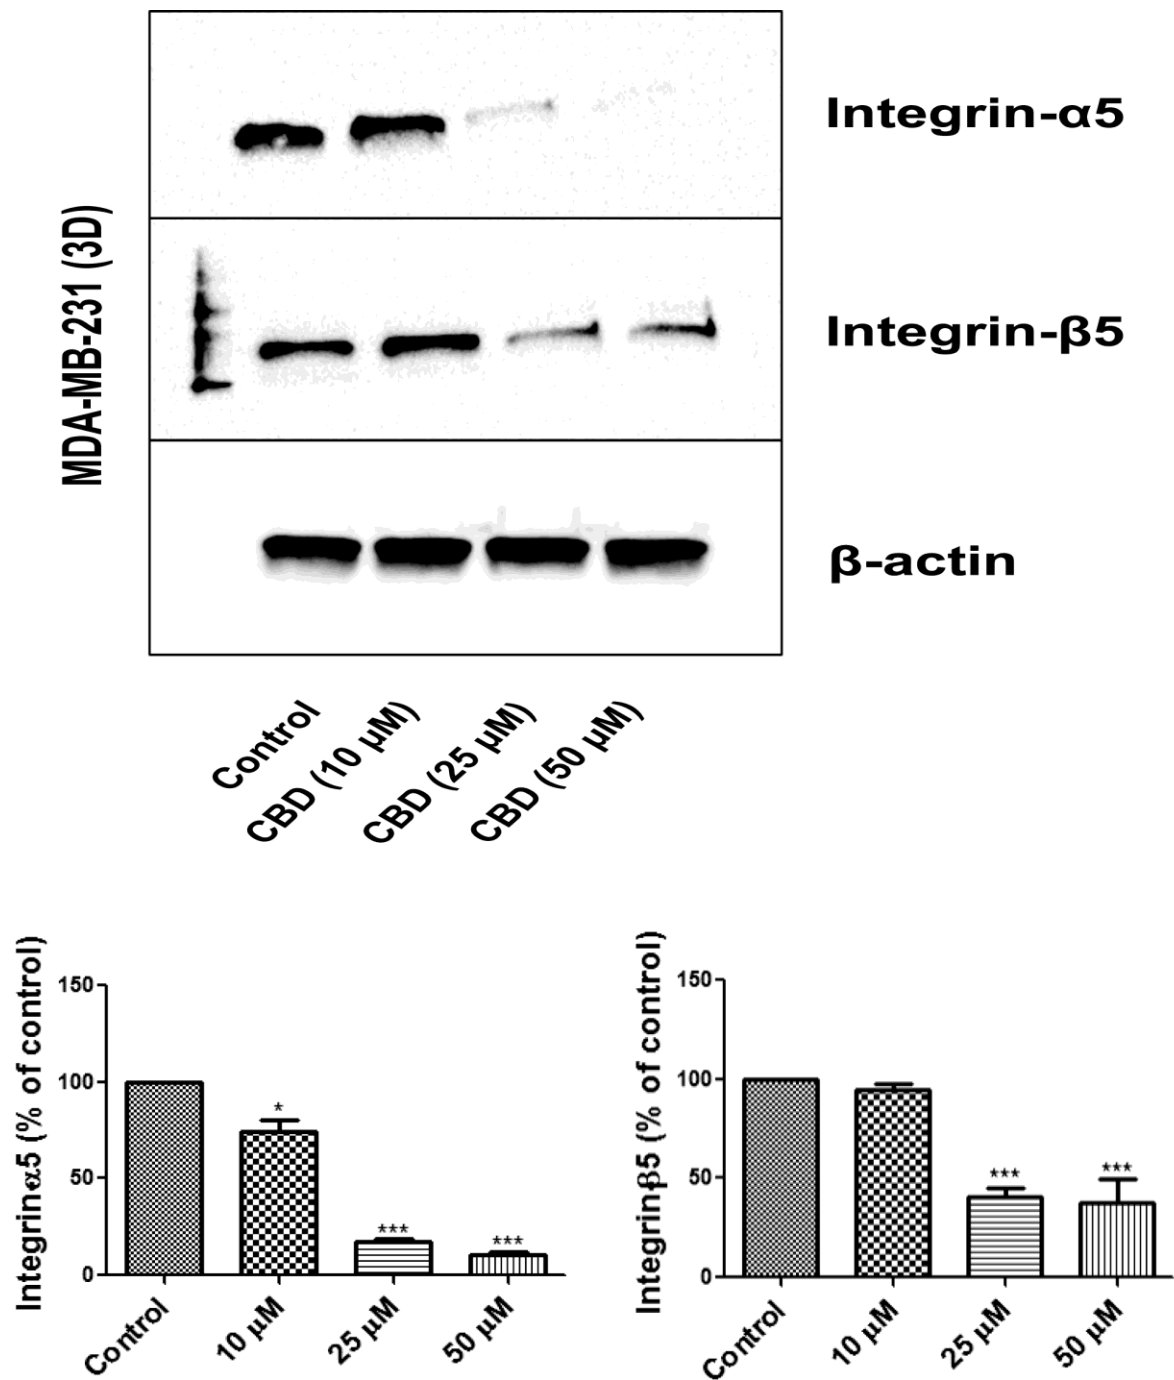

**Supplementary Fig. 4** Immunoblots and densitometry data of integrin- $\alpha$ 5, integrin- $\beta$ 5 and integrin- $\beta$ 1 in CBD treated 3D cultures of MDA-MB-231 cells for 48 h. After checking the expression of Integrin  $\beta$ 5, we had performed stripping and reprobated the same blot with Integrin  $\alpha$ 5 antibody. Uncropped images of the blots have been shown in supplementary information. \* $p < 0.05$ , \*\* $p < 0.01$ , \*\*\* $p < 0.001$  significant vs control.

Supplementary Fig. 5 Effect of CBD on the autophagy of MDA-MB-231 cells

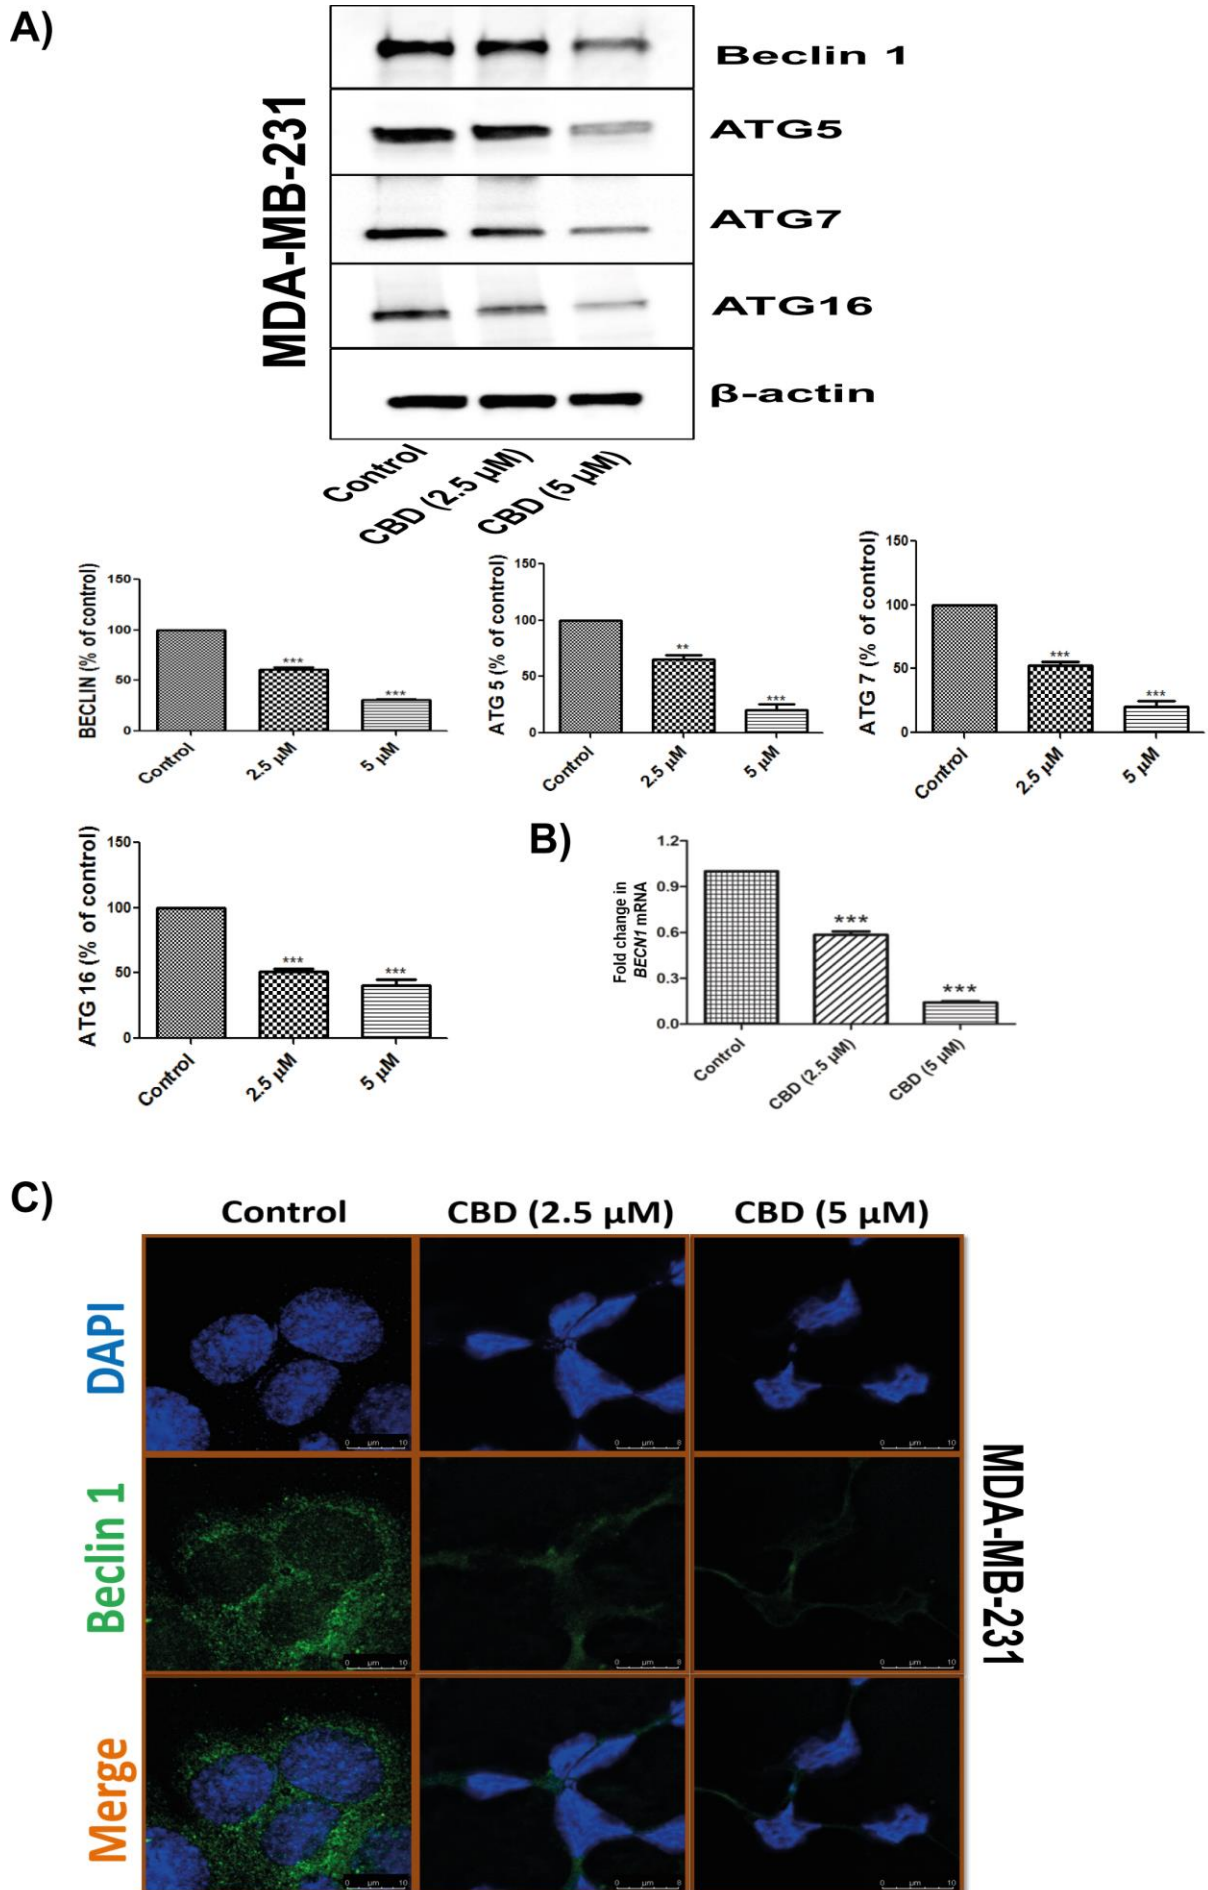

D)

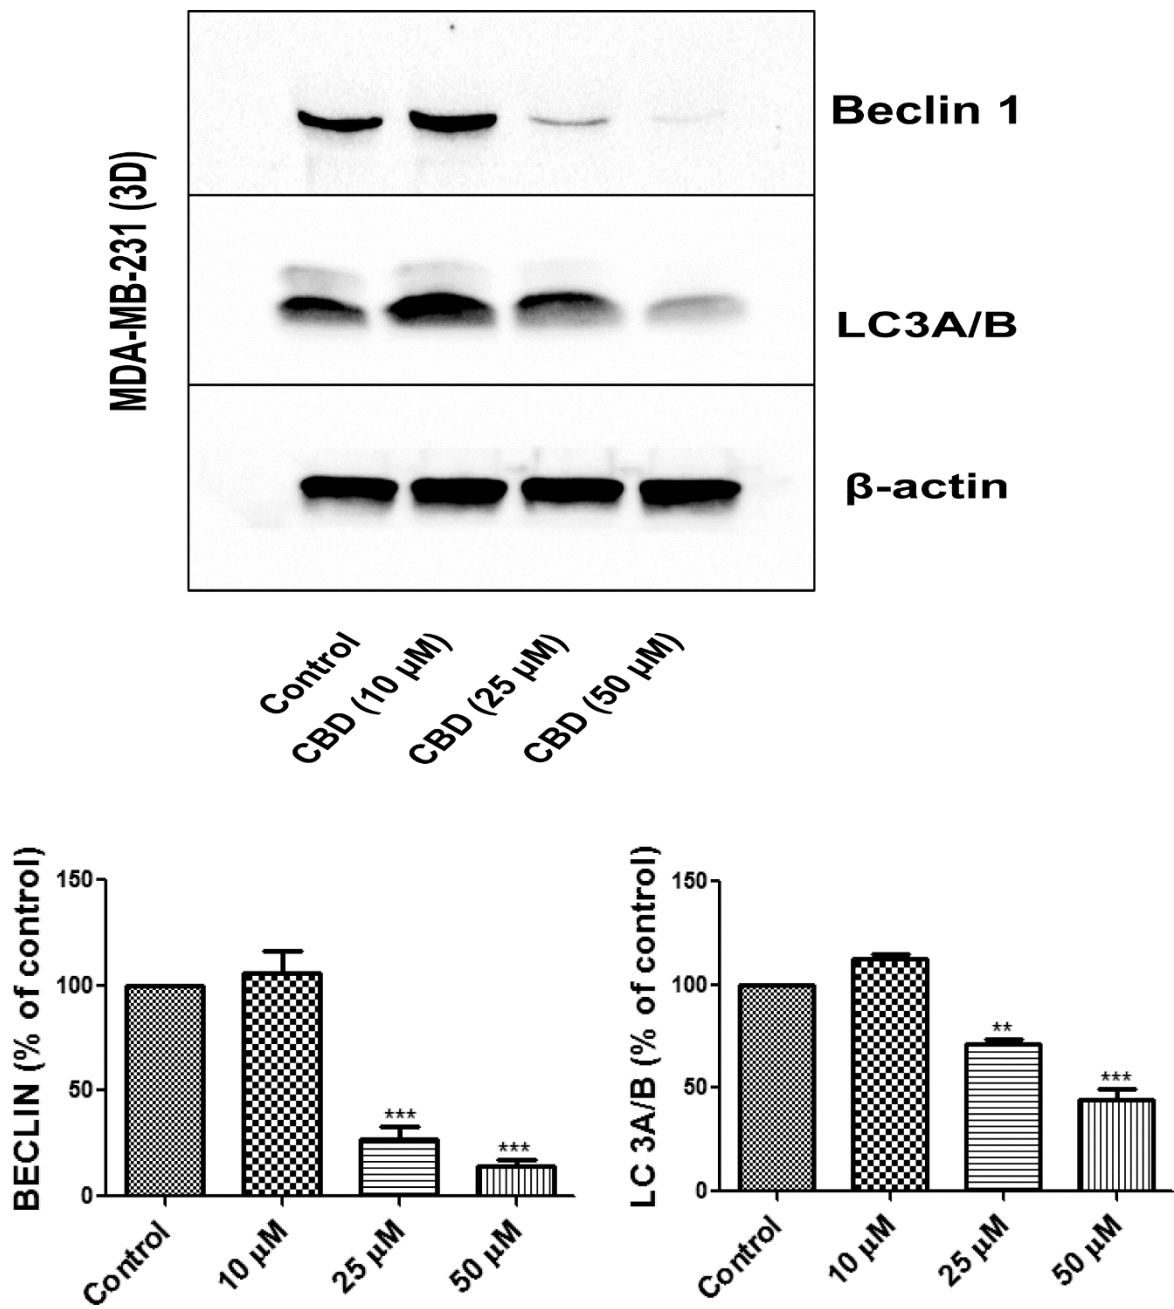

**Supplementary Fig. 5** Effect of CBD on the autophagy markers in MDA-MB-231 cells. A) Immunoblots and densitometry data of Beclin 1, ATG5, ATG7, and ATG16 in CBD treated MDA-MB-231 cells for 48 h. After checking the expression of Beclin 1 and ATG16, we had performed stripping and reprobated the same blots with ATG5, and β-actin antibodies respectively. Uncropped images of the blots have been shown in supplementary information. B) Quantitative real-time PCR of *BECN1* gene after treatment with CBD for 48 h in MDA-MB-231 cells. C) Immunocytochemical analysis of Beclin 1 in MDA-MB-231 cells treated with CBD for 48 h. D) Immunoblots and densitometry data of Beclin 1 and LC3A/B in 3D cultures of CBD treated MDA-MB-231 cells for 48 h. After checking the expression of Beclin 1, we performed stripping and reprobated the same blot with β-actin antibody. Uncropped images of the blots have been shown in supplementary information. \* $p < 0.05$ , \*\* $p < 0.01$ , \*\*\* $p < 0.001$  significant vs control.

**Supplementary Fig. 6** Effect of CBD on the autophagy of MDA-MB-468 cells



A)

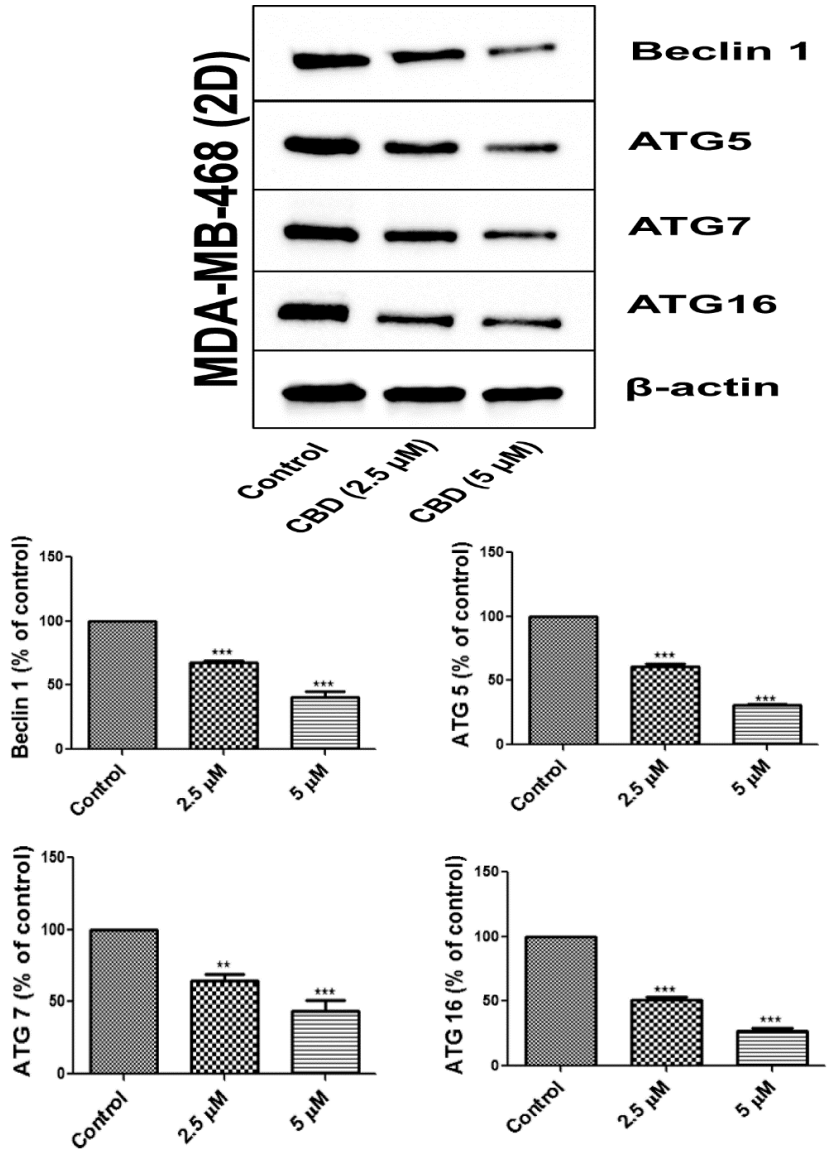

B)

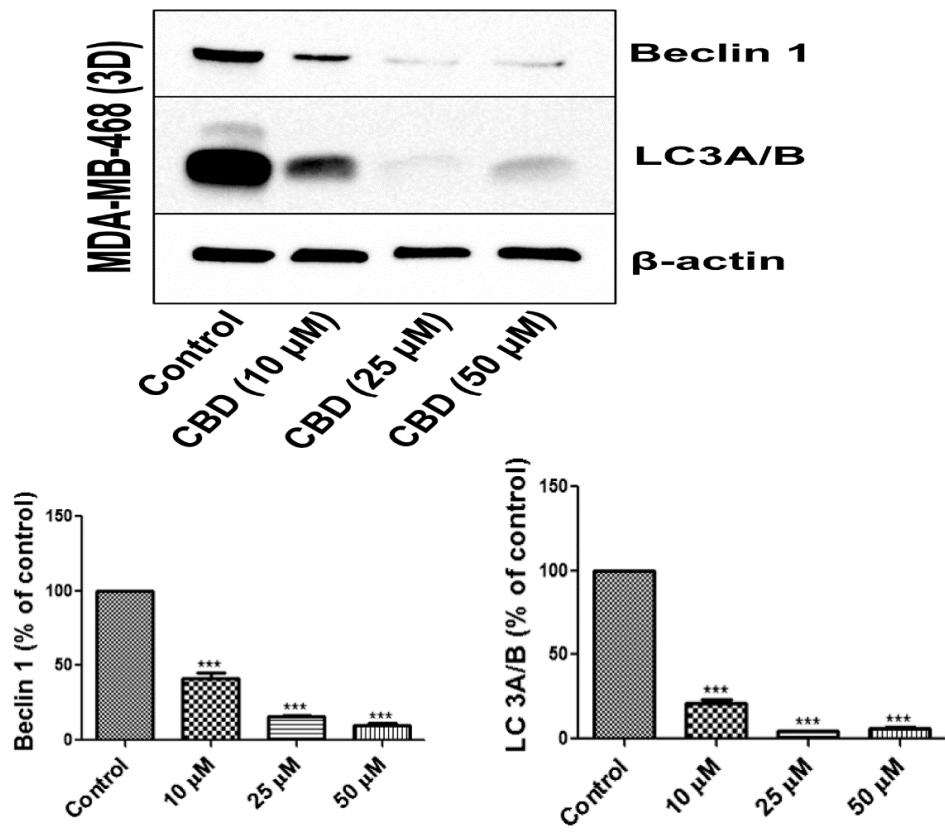

C)

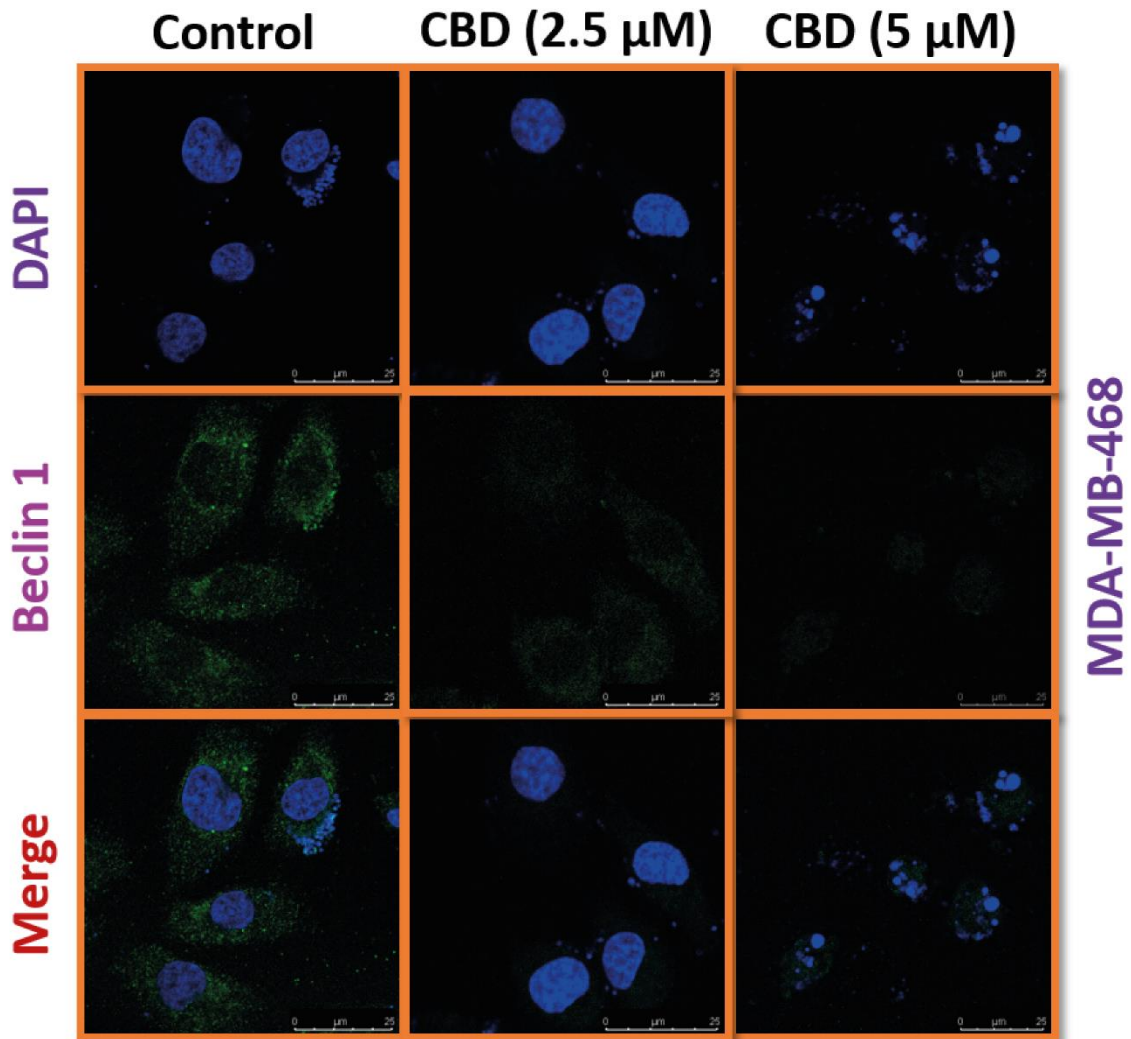

**Supplementary Fig. 6** Effect of CBD on the autophagy markers in MDA-MB-468 cells. A) Immunoblots and densitometry data of Beclin 1, ATG5, ATG7, and ATG16 in 2D cultures of CBD treated MDA-MB-468 cells for 48 h. After checking the expression of ATG7, we performed stripping and reprobated the same blots with ATG5, Beclin1, ATG16, and  $\beta$ -actin antibodies respectively. B) Immunoblots and densitometry data of Beclin 1 and LC3A/B in 3D cultures of CBD treated MDA-MB-468 cells for 48 h. After checking the expression of Beclin 1, we performed stripping and reprobated the same blot with  $\beta$ -actin antibody. Uncropped images of the blots have been shown in supplementary information. \*\*\* $p < 0.001$  significant vs control. C) Immunocytochemical analysis of Beclin 1 in MDA-MB-468 cells treated with CBD for 48 h.

**Supplementary Fig. 7** Effect of CBD on the expression of LOX protein in both MDA-MB-231 and MDA-MB-468 cells

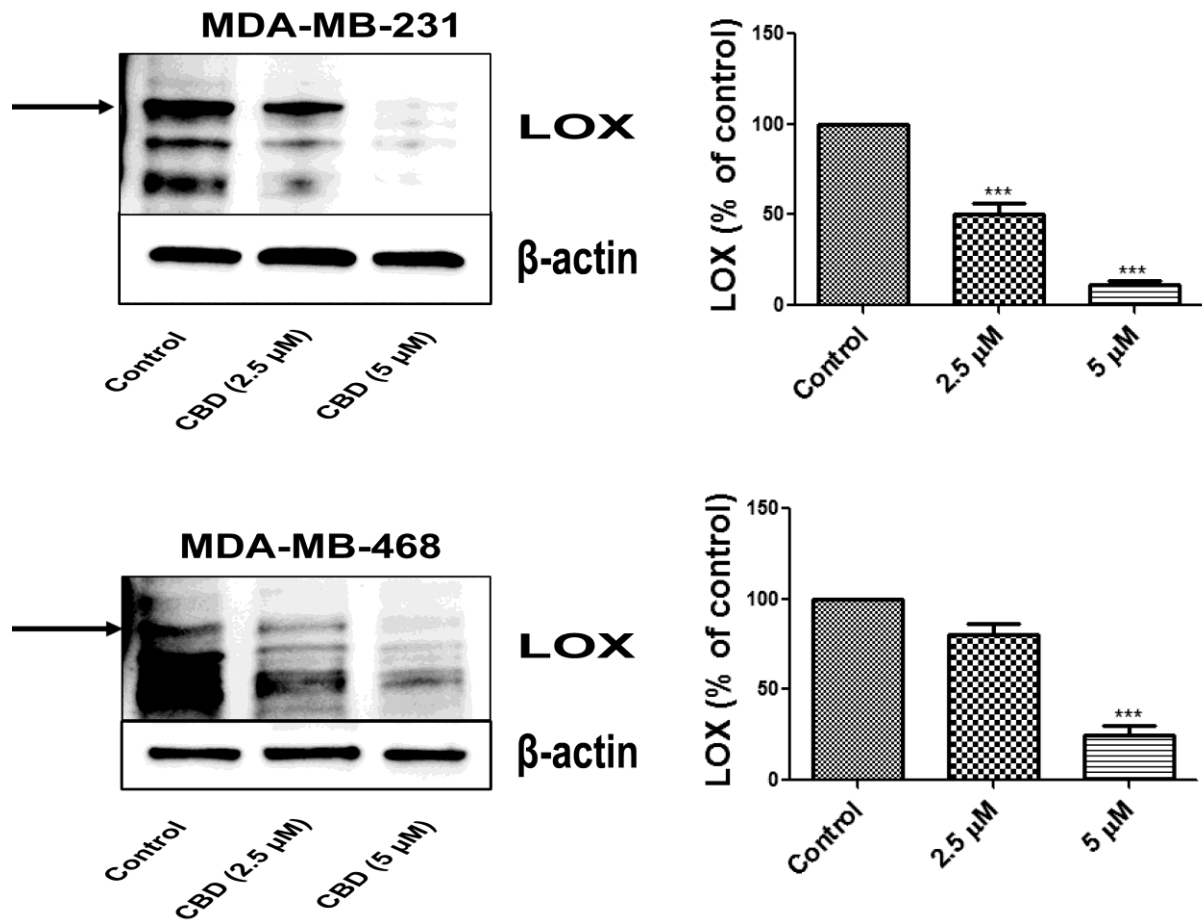

**Supplementary Fig. 7** Immunoblots and densitometry data of LOX in 2D cultures of CBD treated MDA-MB-231 and MDA-MB-468 cells for 48 h.  $\beta$  After checking the expression of LOX, we performed stripping and reprobated the same blot with  $\beta$ -actin antibody. Uncropped images of the blots have been shown in supplementary information. \*\*\* $p < 0.001$  significant vs control.

## 2) Supplementary Tables

**Supplementary Table 1:** Combinatorial effects of CBD and DOX in MDA-MB-231 cells

| Combinations ( $\mu\text{M}$ ) | Cytotoxicity (%; Mean) | DRI (CBD; DOX) | CI value | Conclusion |
|--------------------------------|------------------------|----------------|----------|------------|
| CBD (1) + DOX (0.39)           | 41.8                   | 2.16; 5.77     | 0.635    | Synergism  |
| CBD (1) + DOX (0.78)           | 48.3                   | 2.62; 3.55     | 0.662    | Synergism  |
| CBD (1) + DOX (1.56)           | 53.1                   | 3.02; 2.06     | 0.814    | Synergism  |
| CBD (1) + DOX (3.12)           | 62.6                   | 4.02; 1.40     | 0.959    | Synergism  |
| CBD (1) + DOX (6.25)           | 67.9                   | 4.78; 0.84     | 1.394    | Antagonism |
| CBD (1) + DOX (12.5)           | 70.8                   | 5.28; 0.46     | 2.318    | Antagonism |
| CBD (1) + DOX (25)             | 74.2                   | 5.99; 0.26     | 3.889    | Antagonism |
| CBD (2.5) + DOX (0.39)         | 44.3                   | 0.93; 6.26     | 1.232    | Antagonism |
| CBD (2.5) + DOX (0.78)         | 45.2                   | 0.95; 3.22     | 1.354    | Antagonism |
| CBD (2.5) + DOX (1.56)         | 57.8                   | 1.39; 2.40     | 1.135    | Antagonism |
| CBD (2.5) + DOX (3.12)         | 60.7                   | 1.51; 1.31     | 1.416    | Antagonism |
| CBD (2.5) + DOX (6.25)         | 69.7                   | 2.03; 0.90     | 1.601    | Antagonism |
| CBD (2.5) + DOX (12.5)         | 71.6                   | 2.17; 0.48     | 2.524    | Antagonism |
| CBD (2.5) + DOX (25)           | 76.4                   | 2.61; 0.29     | 3.774    | Antagonism |

**Supplementary Table 1:** Combinatorial effects of CBD and DOX in MDA-MB-231 cells. CI and DRI values were determined by using CI equation algorithms and DRI equation algorithms through CompuSyn software. CI=1, <1, and >1 represents an additive effect, synergism, and antagonism, respectively. DRI=1, >1, and <1 represent no dose reduction, favourable dose reduction, and unfavourable dose reduction respectively, for each drug in the combination. CI: combination index; DRI: dose-reduction index

**Supplementary Table 2:** Combinatorial effects of CBD and DOX in MDA-MB-468 cells

| Combinations ( $\mu\text{M}$ ) | Cytotoxicity (%; Mean) | DRI (CBD; DOX) | CI value | Conclusion |
|--------------------------------|------------------------|----------------|----------|------------|
| CBD (1) + DOX (0.39)           | 38.3                   | 2.15; 3.33     | 0.764    | Synergism  |
| CBD (1) + DOX (0.78)           | 39                     | 2.21; 1.72     | 1.032    | Additive   |
| CBD (1) + DOX (1.56)           | 43.9                   | 2.72; 1.06     | 1.302    | Antagonism |
| CBD (1) + DOX (3.12)           | 56                     | 4.48; 0.90     | 1.332    | Antagonism |
| CBD (1) + DOX (6.25)           | 67.9                   | 7.54; 0.77     | 1.421    | Antagonism |
| CBD (1) + DOX (12.5)           | 73.2                   | 9.79; 0.51     | 2.061    | Antagonism |
| CBD (1) + DOX (25)             | 76.9                   | 11.99; 0.31    | 3.251    | Antagonism |
| CBD (2.5) + DOX (0.39)         | 41.8                   | 0.99; 3.89     | 1.257    | Antagonism |
| CBD (2.5) + DOX (0.78)         | 46.9                   | 1.23; 2.43     | 1.220    | Antagonism |
| CBD (2.5) + DOX (1.56)         | 53.1                   | 1.59; 1.58     | 1.257    | Antagonism |
| CBD (2.5) + DOX (3.12)         | 62.6                   | 2.37; 1.20     | 1.248    | Antagonism |
| CBD (2.5) + DOX (6.25)         | 67.9                   | 3.01; 0.77     | 1.620    | Antagonism |
| CBD (2.5) + DOX (12.5)         | 70.8                   | 3.46; 0.44     | 2.514    | Antagonism |
| CBD (2.5) + DOX (25)           | 74.5                   | 4.19; 0.27     | 3.883    | Antagonism |

**Supplementary Table 2:** Combinatorial effects of CBD and DOX in MDA-MB-468 cells. CI and DRI values were determined by using CI equation algorithms and DRI equation algorithms through CompuSyn software. CI=1, <1, and >1 represents an additive effect, synergism, and antagonism, respectively. DRI=1, >1, and <1 represent no dose reduction, favourable dose reduction, and unfavourable dose reduction respectively, for each drug in the combination. CI: combination index; DRI: dose-reduction index.

3) Uncropped western blot images

1) Fig. 3A (MDA-MB-231 2D)

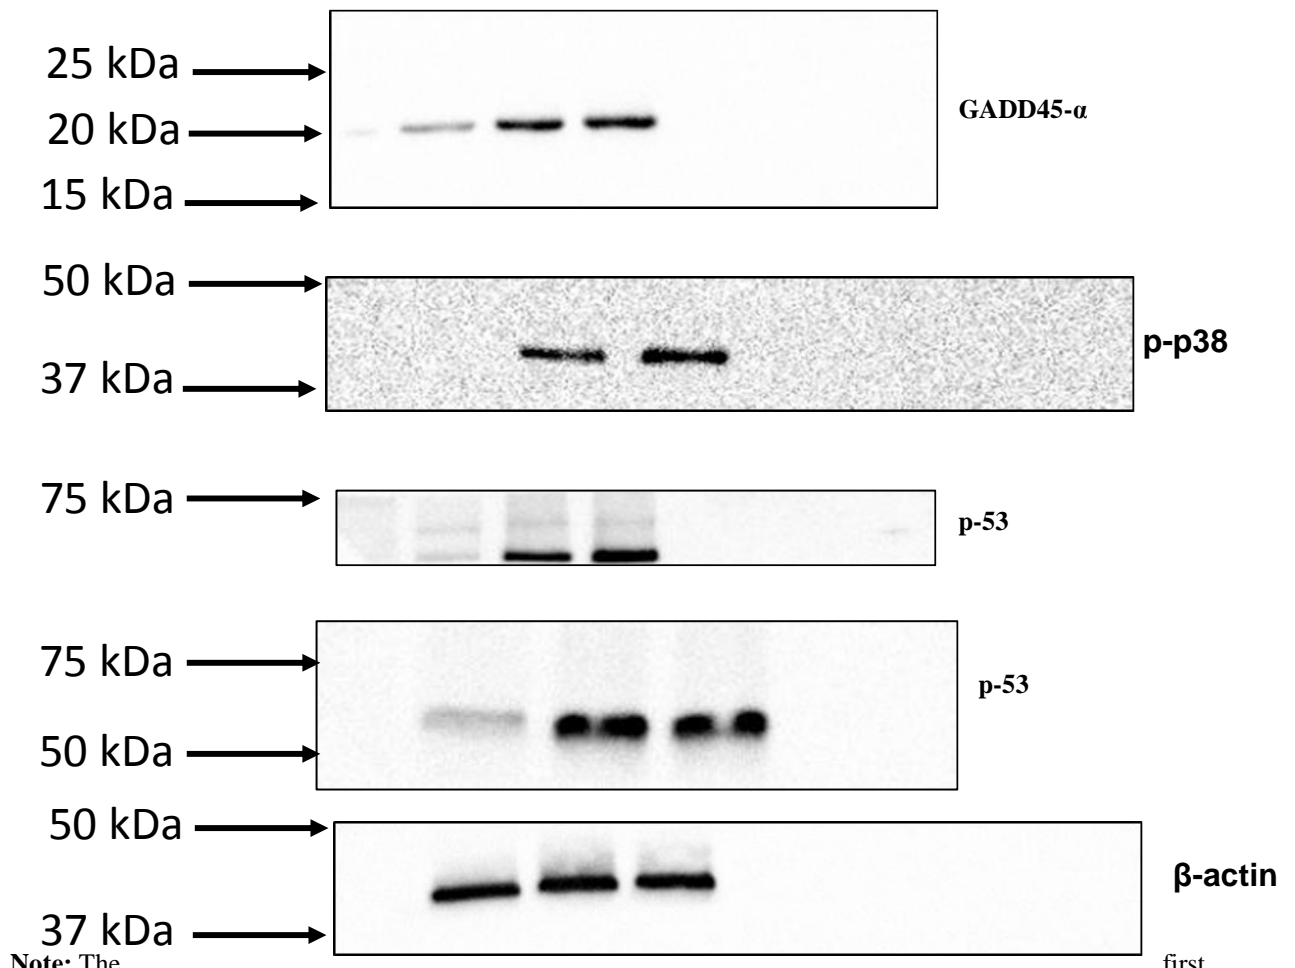

Note: The first lane, second lane and the third lane indicate Control, CBD (2.5 μM) and CBD (5 μM) treated groups respectively in the above represented blots.

Fig. 3B (MDA-MB-468 2D)

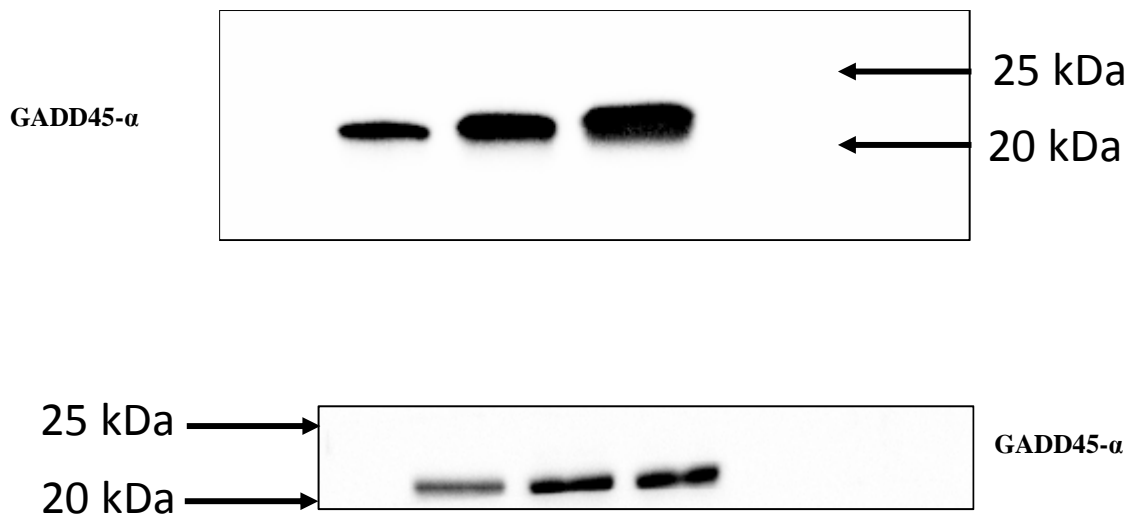

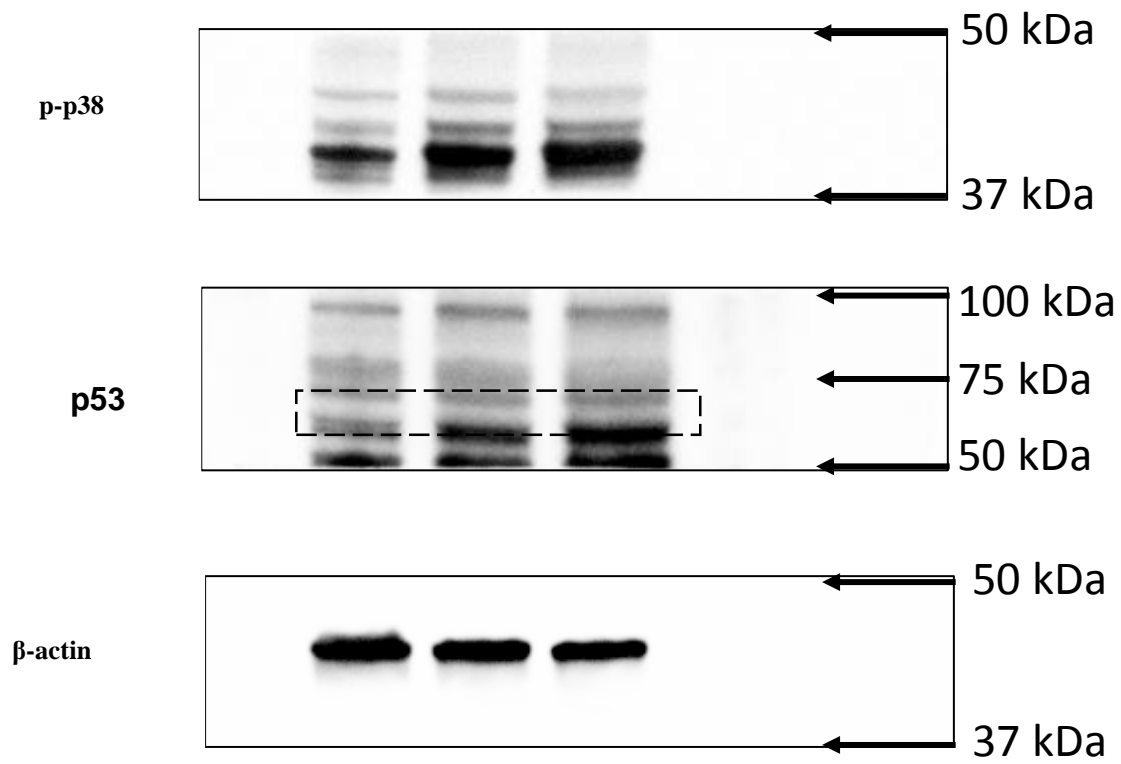

**Note:** The first lane, second lane and the third lane indicate Control, CBD (2.5 μM) and CBD (5 μM) treated groups respectively in the above represented blots.

2) Fig. 4A (MDA-MB-231 2D)

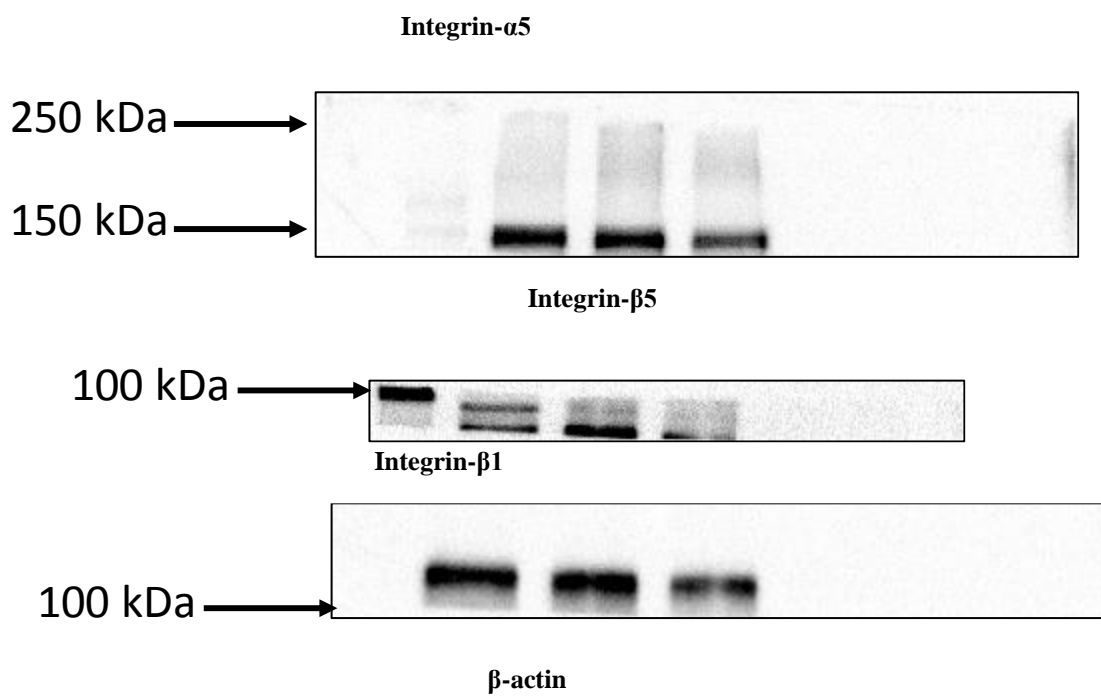

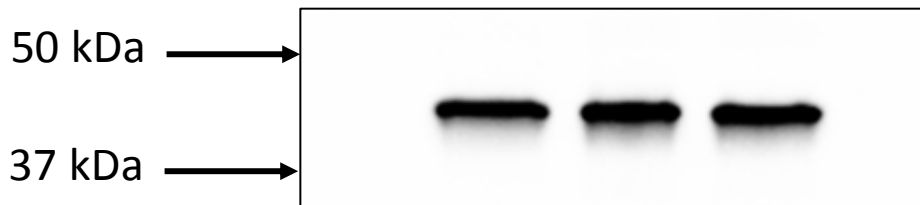

**Note:** The first lane, second lane and the third lane indicate Control, CBD (2.5  $\mu$ M) and CBD (5  $\mu$ M) treated groups respectively in the above represented blots.

**Fig. 4B (MDA-MB-468 2D)**

**Integrin- $\alpha$ 5**

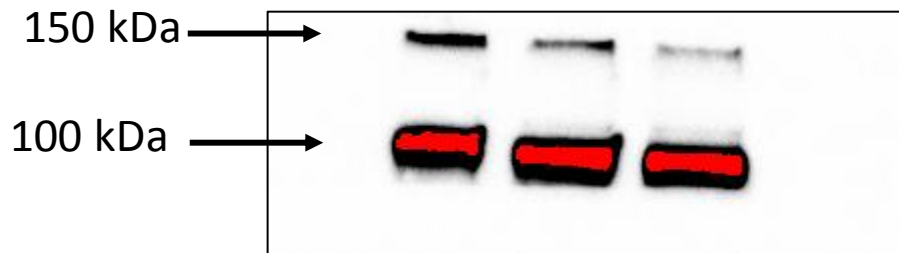

**Integrin- $\beta$ 5**

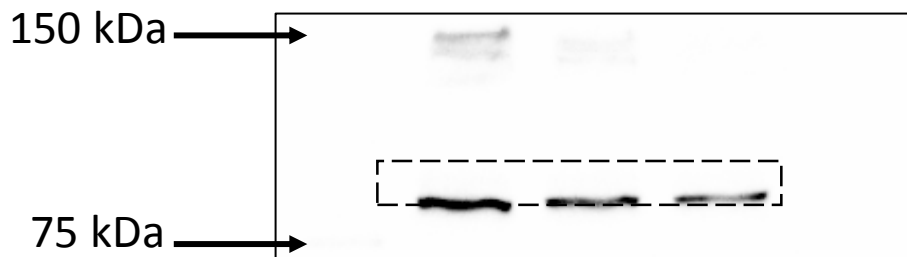

**Integrin- $\beta$ 1**

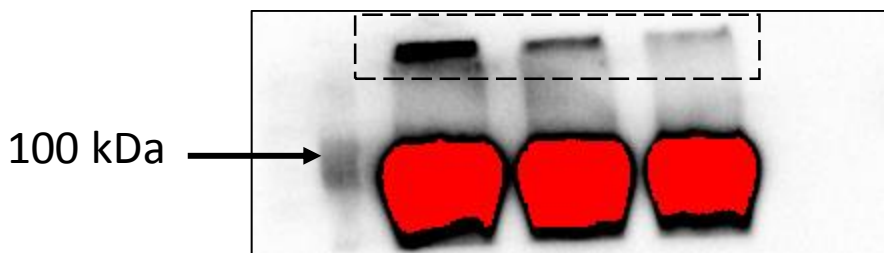

**$\beta$ -actin**

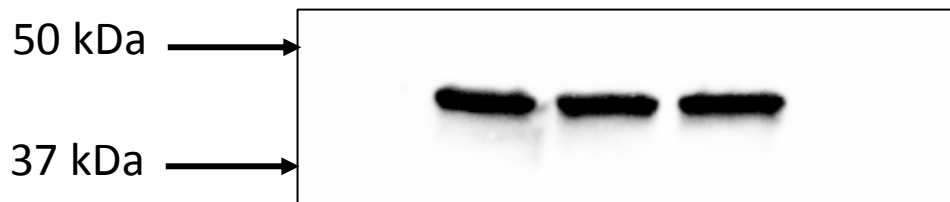

**Note:** The first lane, second lane and the third lane indicate Control, CBD (2.5  $\mu\text{M}$ ) and CBD (5  $\mu\text{M}$ ) treated groups respectively in the above represented blots.

**Fig. 4C (MDA-MB-468 3D)**

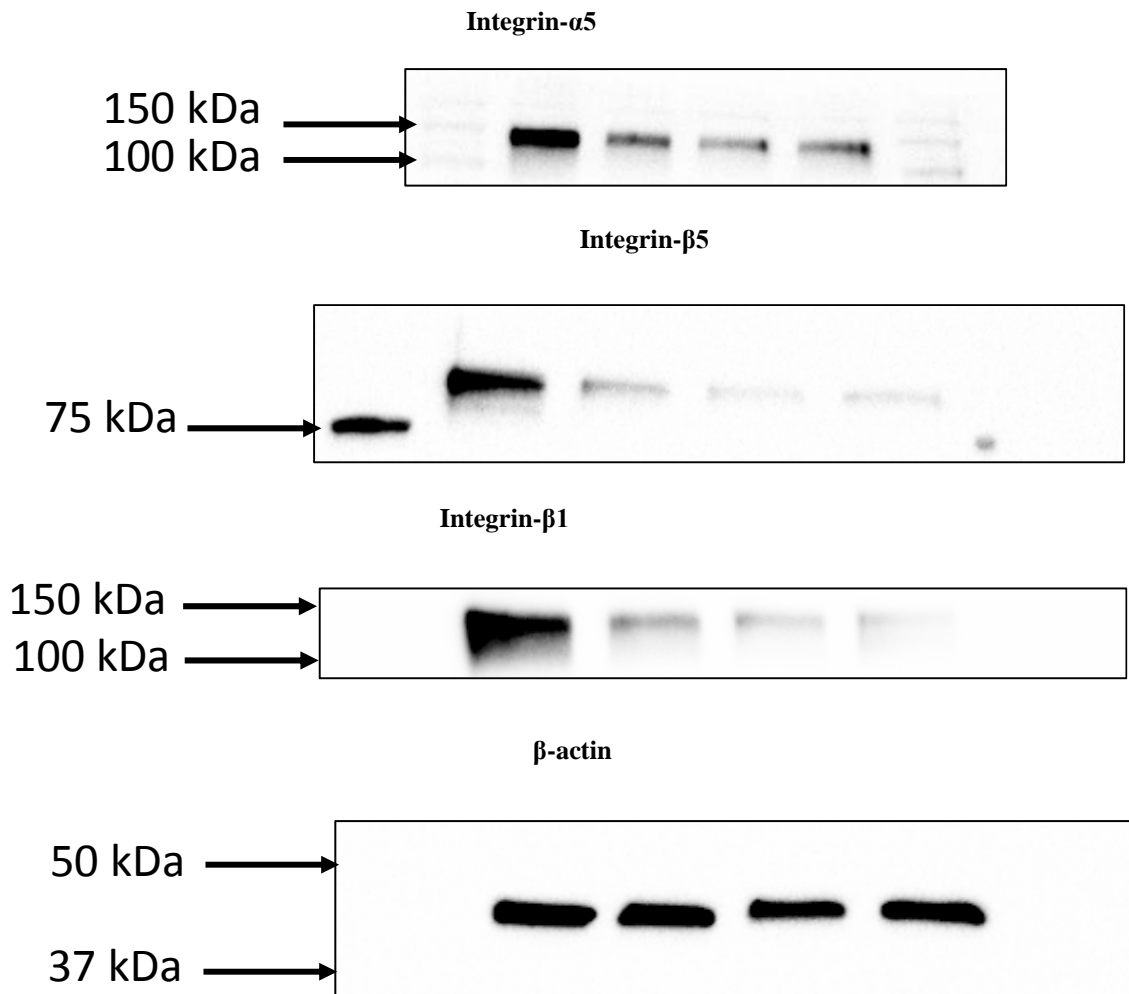

**Note:** The first lane, second lane, third lane and the fourth lane indicate Control, CBD (10  $\mu\text{M}$ ), CBD (25  $\mu\text{M}$ ) and CBD (50  $\mu\text{M}$ ) treated groups respectively in the above represented blots.

**3) Fig. 5B (MDA-MB-231 2D)**

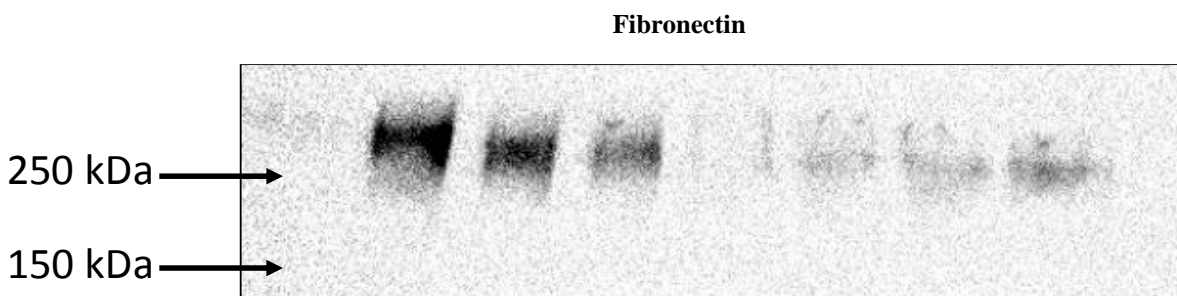



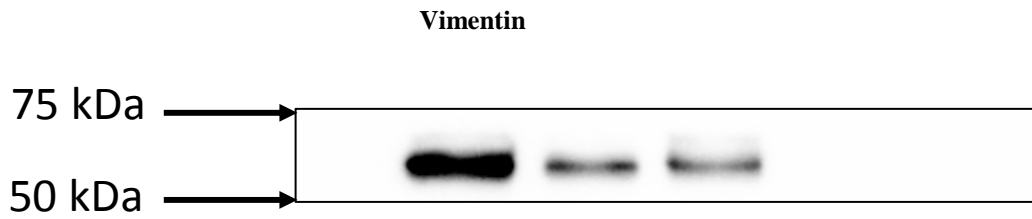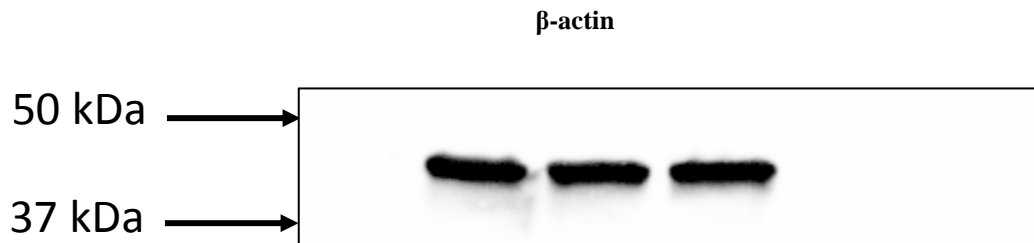

**Note:** The first lane, second lane and the third lane indicate Control, CBD (2.5  $\mu$ M) and CBD (5  $\mu$ M) treated groups respectively in the above represented blots.

**Fig. 5C (MDA-MB-468 2D)**

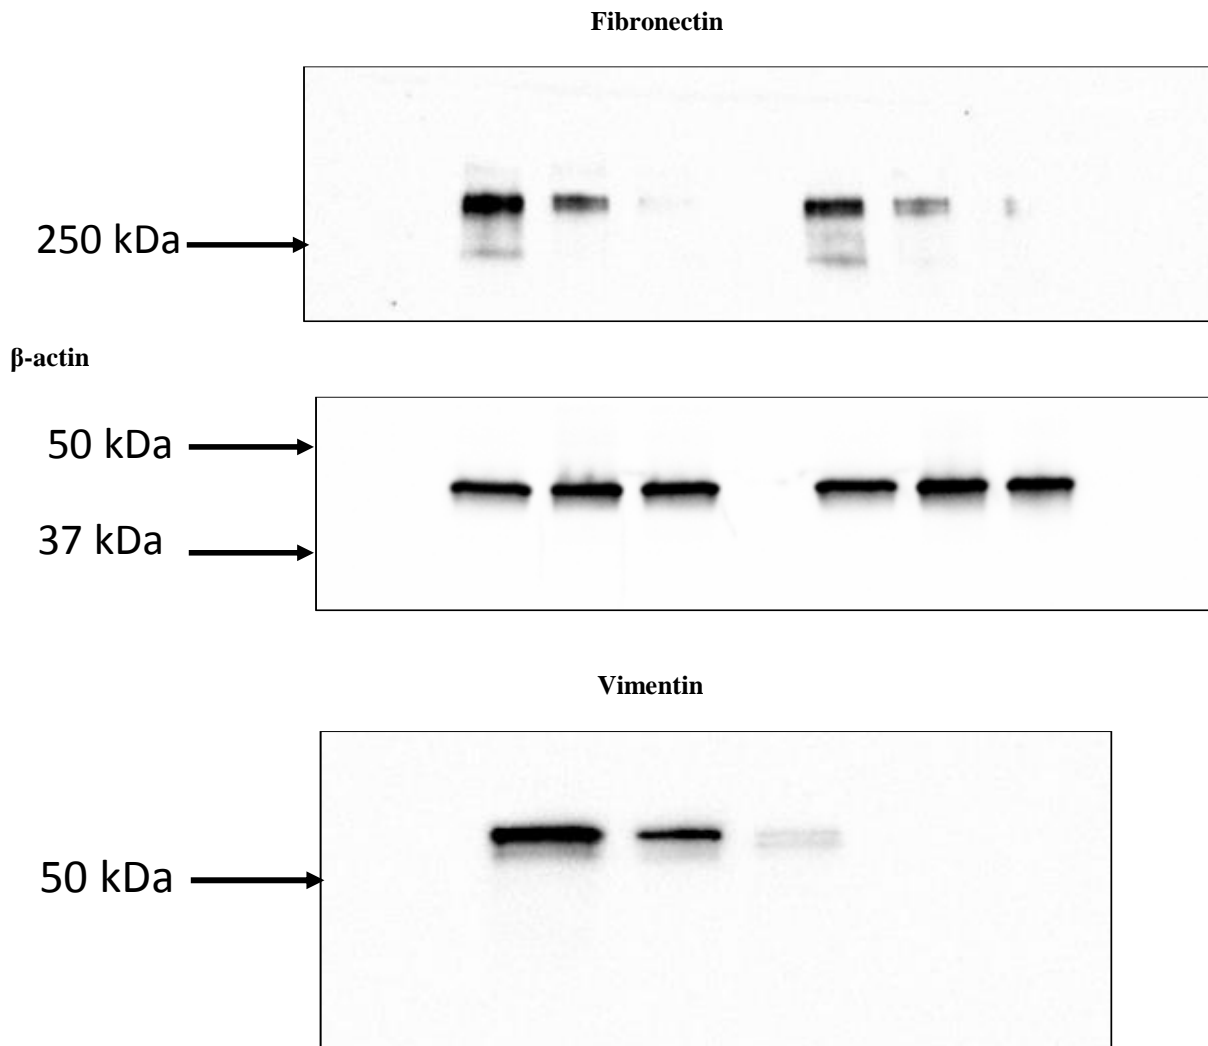

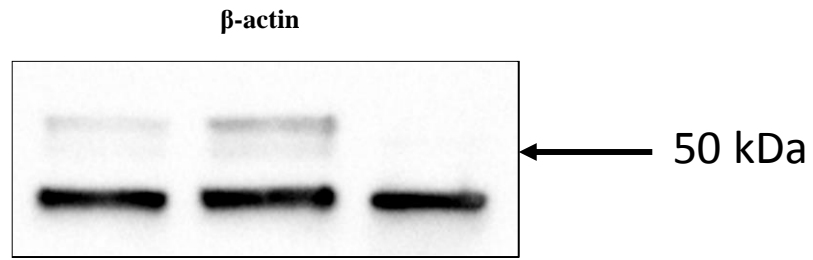

**Note:** The first lane, second lane and the third lane indicate Control, CBD (2.5 μM) and CBD (5 μM) treated groups respectively in the above represented blots.

**4) Fig. 6F (MDA-MB-468 2D)**

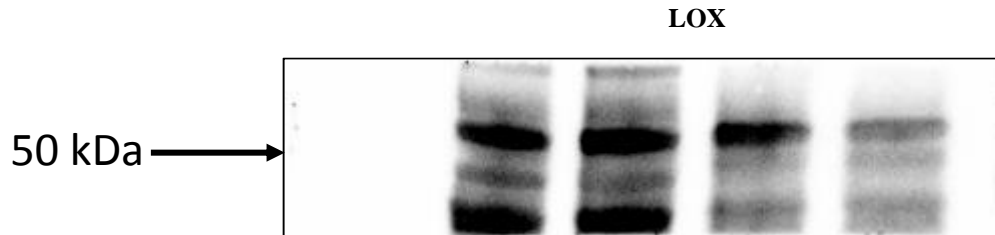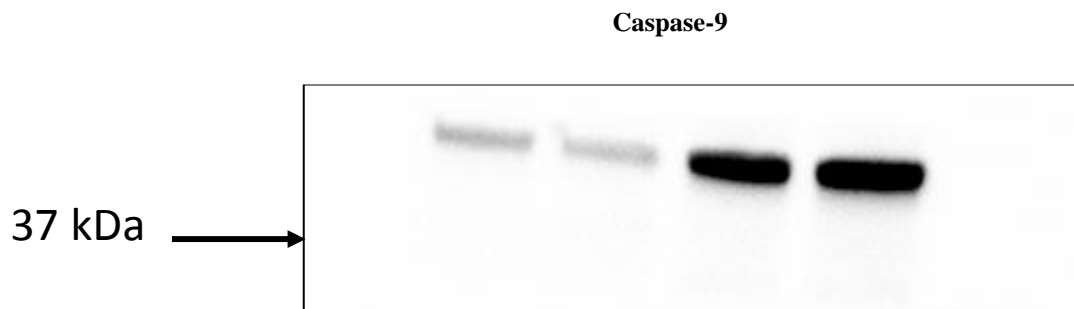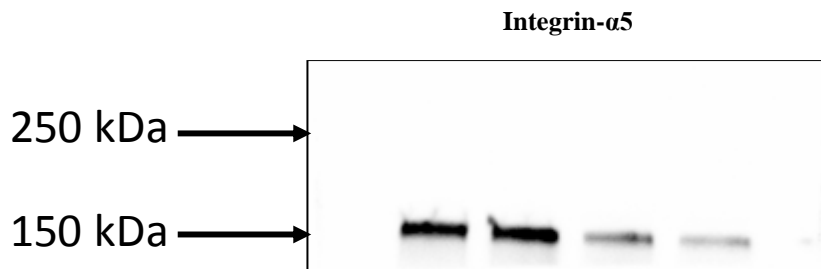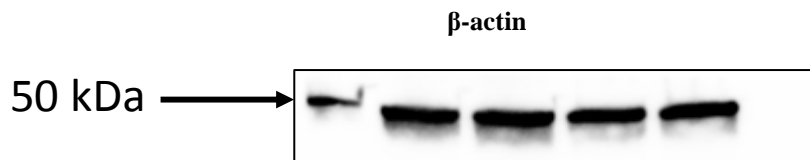

**Note:** The first lane, second lane, third lane and the fourth lane indicate Control, CBD (1 μM), DOX (1 μM) and CBD (1 μM) + DOX (1 μM) treated groups respectively in the above represented blots.

**5) Supplementary Fig. 4 (MDA-MB-231 3D)**

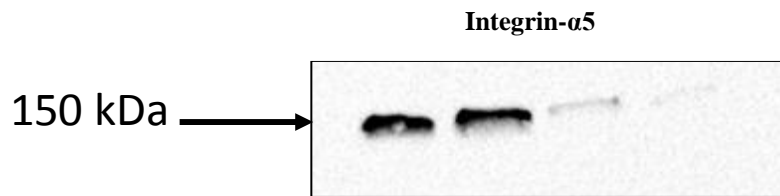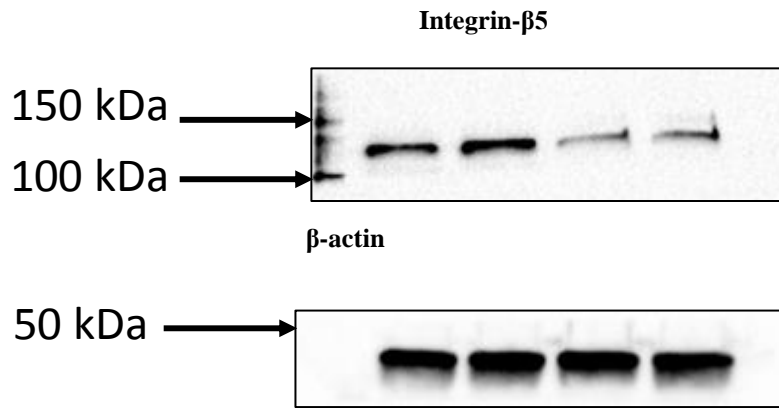

**Note:** The first lane, second lane, third lane and the fourth lane indicate Control, CBD (10  $\mu$ M), CBD (25  $\mu$ M) and CBD (50  $\mu$ M) treated groups respectively in the above represented blots.

6) Supplementary Fig. 5A (MDA-MB-231 2D)

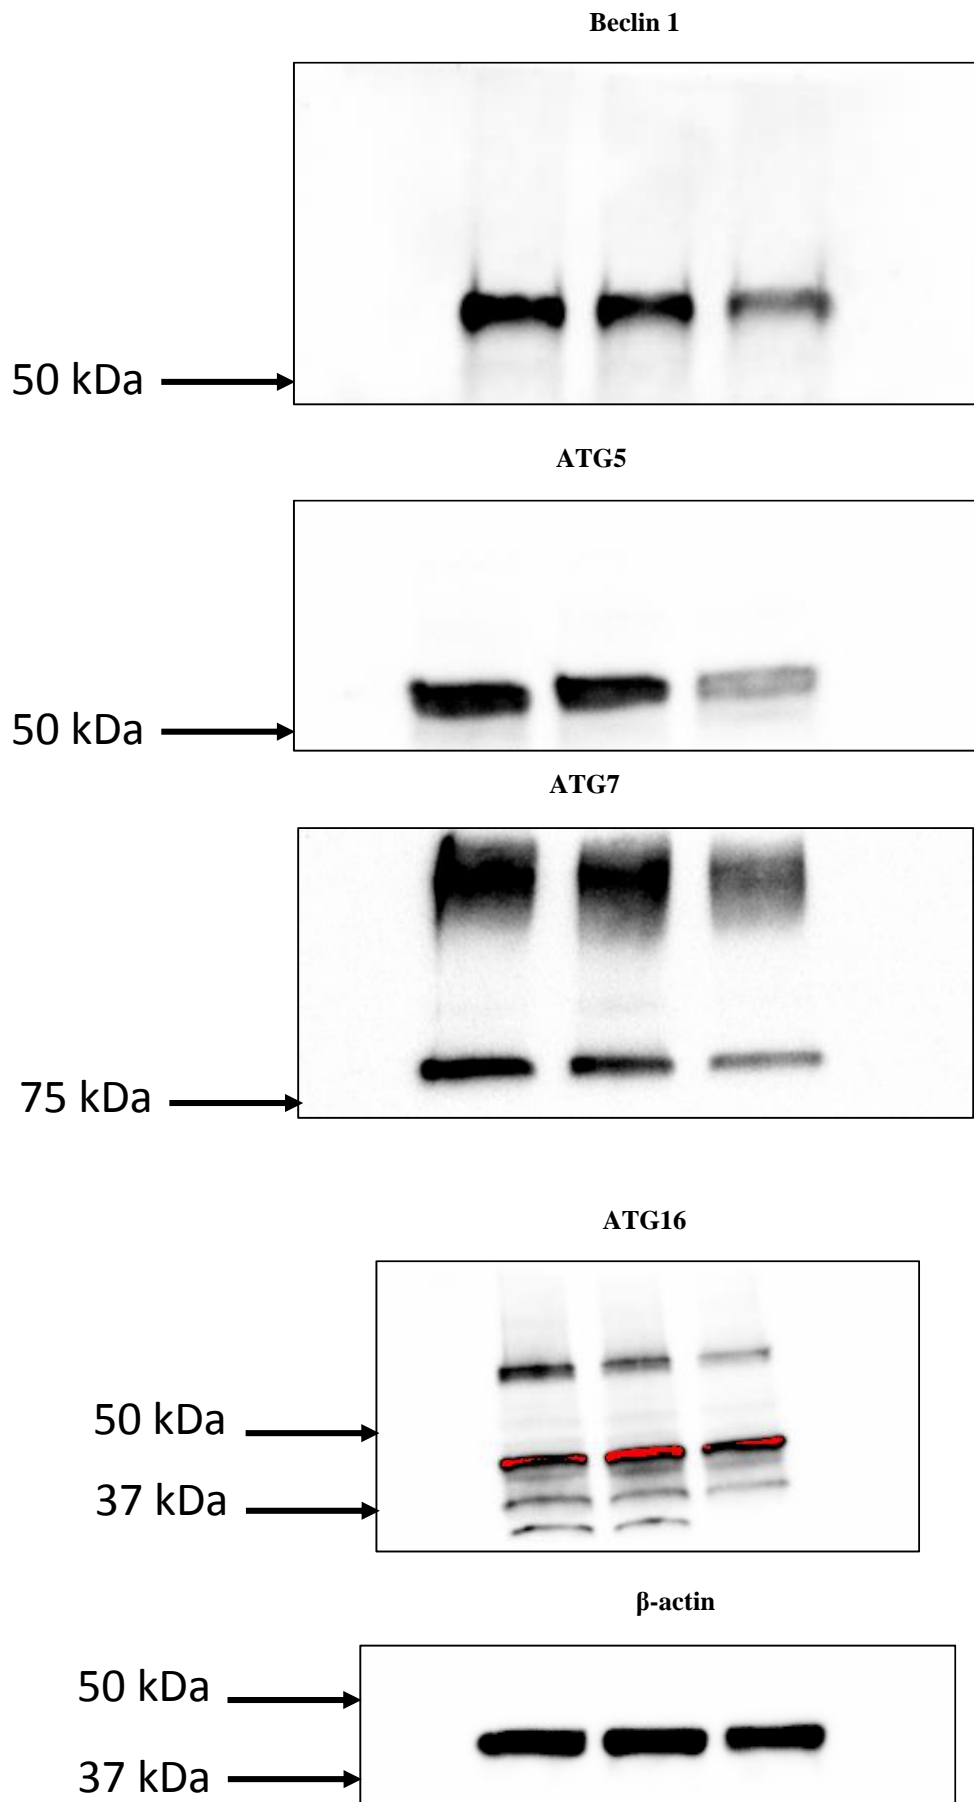

**Note:** The first lane, second lane and the third lane indicate Control, CBD (2.5  $\mu$ M) and CBD (5  $\mu$ M) treated groups respectively in the above represented blots.

**Supplementary Fig. 5D (MDA-MB-231 3D)**

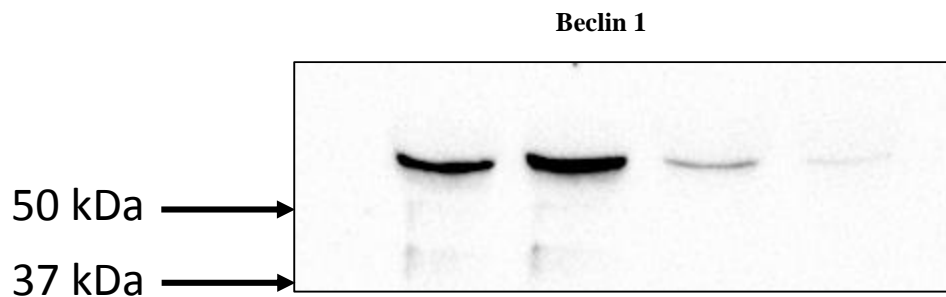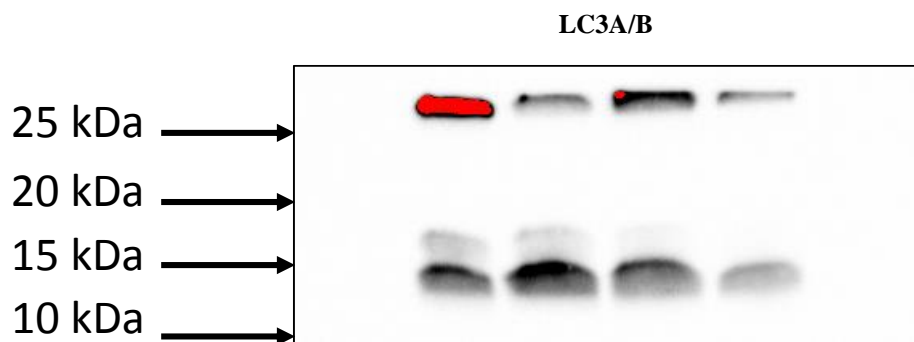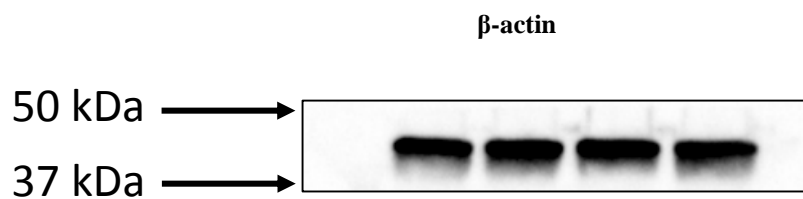

**Note:** The first lane, second lane, third lane and the fourth lane indicate Control, CBD (10  $\mu$ M), CBD (25  $\mu$ M) and CBD (50  $\mu$ M) treated groups respectively in the above represented blots.

**7) Supplementary Fig. 6A (MDA-MB-468 2D)**

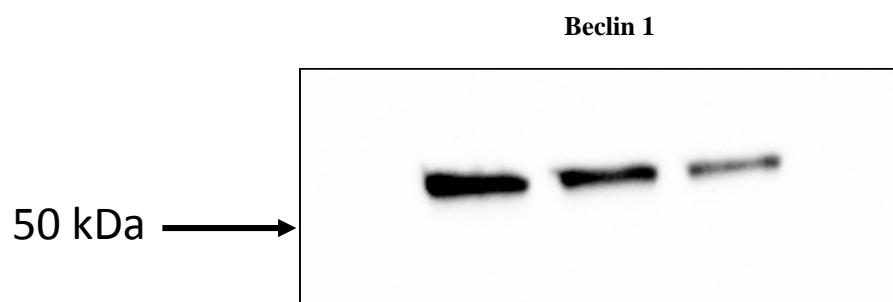

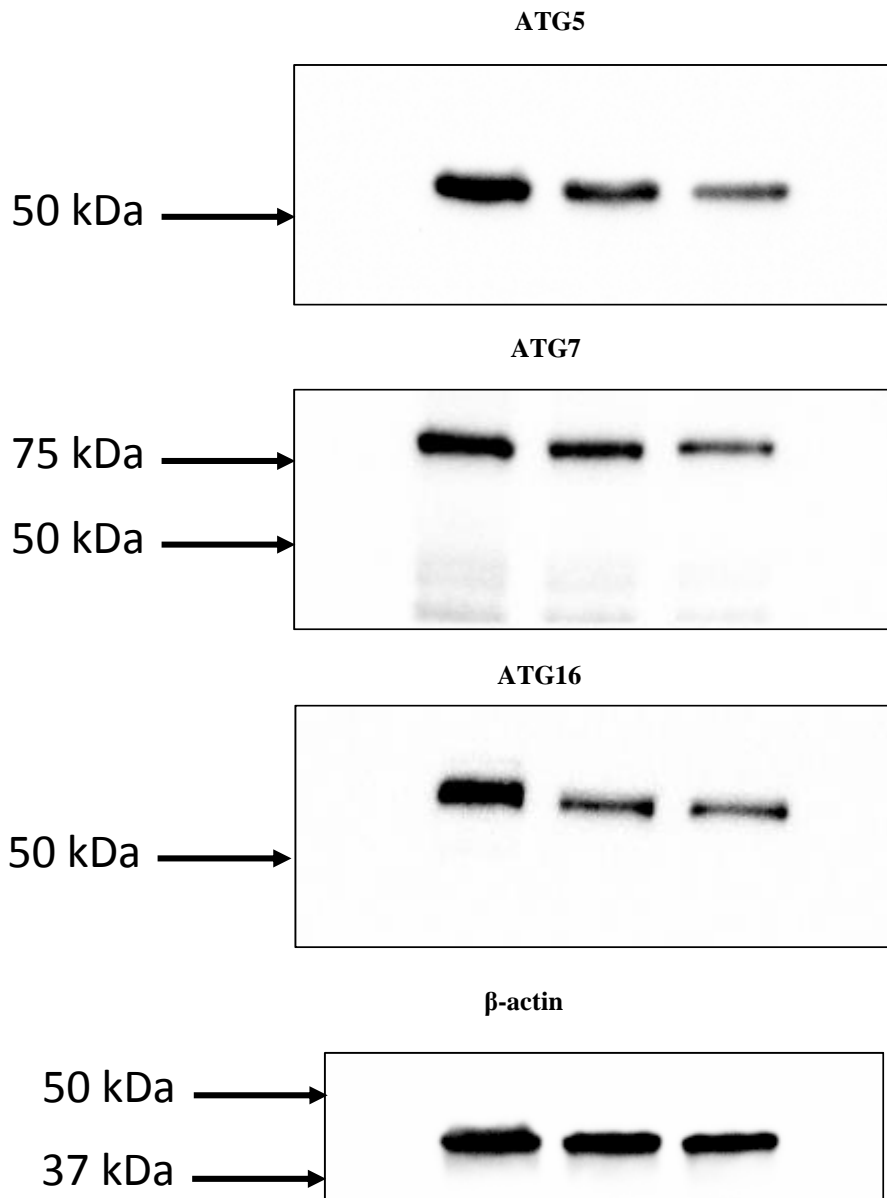

**Note:** The first lane, second lane and the third lane indicate Control, CBD (2.5  $\mu$ M) and CBD (5  $\mu$ M) treated groups respectively in the above represented blots.

**Supplementary Fig. 6B (MDA-MB-468 3D)**

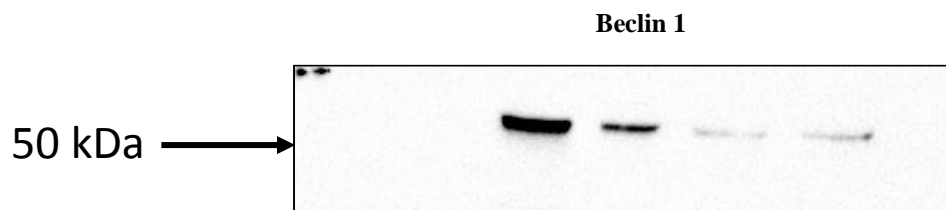

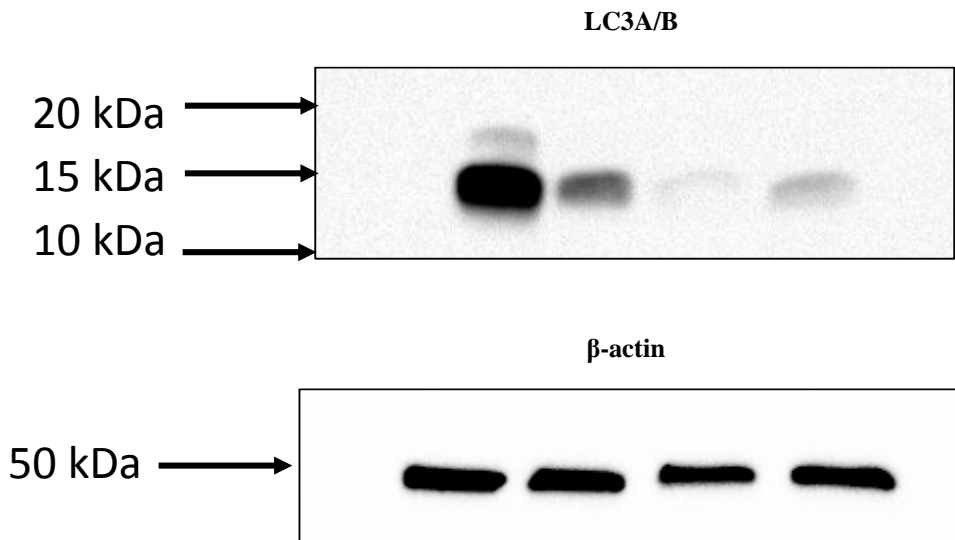

**Note:** The first lane, second lane, third lane and the fourth lane indicate Control, CBD (10  $\mu$ M), CBD (25  $\mu$ M) and CBD (50  $\mu$ M) treated groups respectively in the above represented blots.

**8) Supplementary Fig. 7 (MDA-MB-231 and MDA-MB-468 2D)**

**MDA-MB-231 2D**

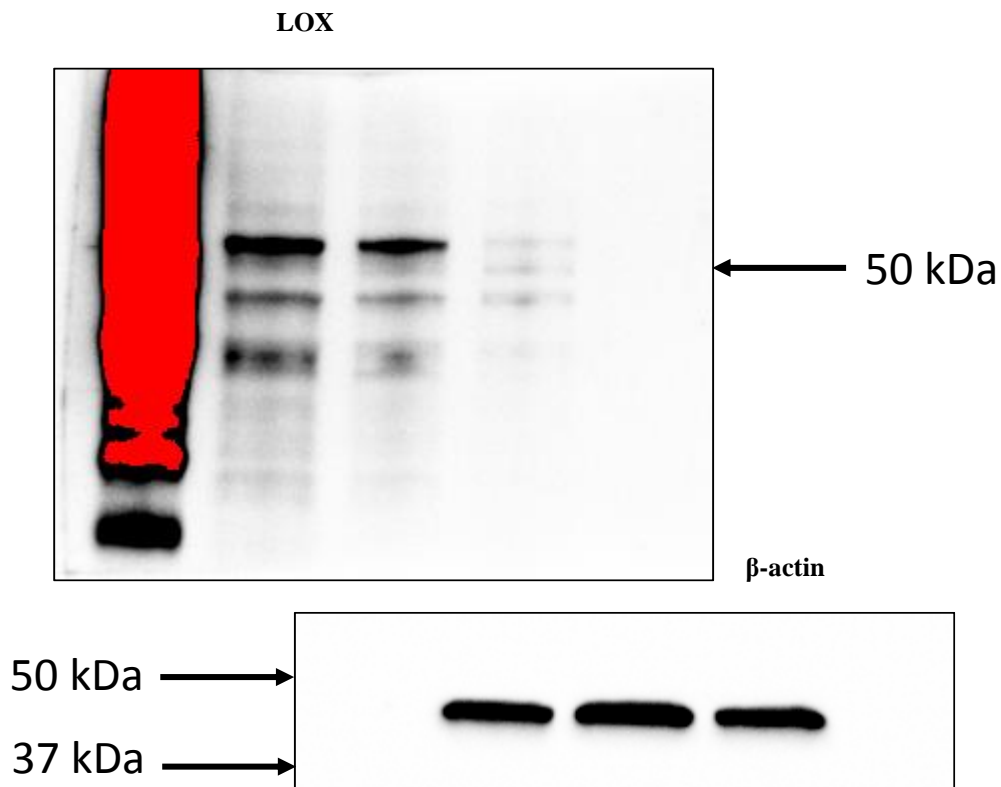

**Note:** The first lane, second lane and the third lane indicate Control, CBD (2.5  $\mu$ M) and CBD (5  $\mu$ M) treated groups respectively in the above represented blots.

**MDA-MB-468 2D**

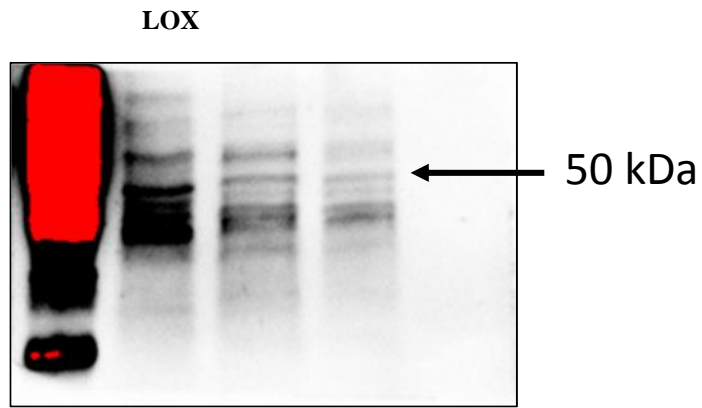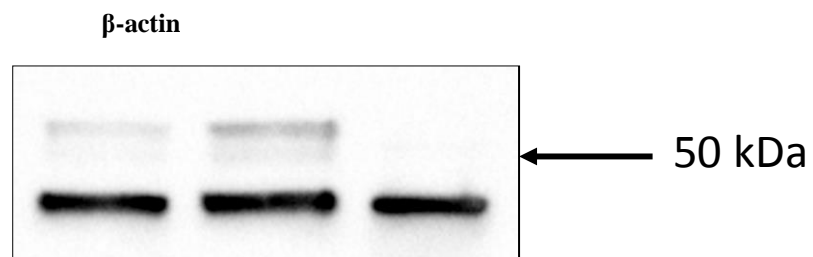

**Note:** The first lane, second lane and the third lane indicate Control, CBD (2.5  $\mu$ M) and CBD (5  $\mu$ M) treated groups respectively in the above represented blots.
